# Supplementary material
Source: PubMed Central journal article supplement (PMC8220408)
Supplement: mmc1.pdf [file mmc1.pdf]

# **Blood clots and bleeding events following BNT162b2 and ChAdOx1 nCoV-19 vaccine: an analysis of European data**

**Page 2 - Keywords for download of SAEs single case reports**

**Page 3 - Table S1.** Gender distribution of vaccines administered doses in Europe

**Page 4 - Table S2.** Number of vaccines administered doses in Europe

**Page 5 - Table S3.** Number of individual patient reports of AE reported in the EudraVigilance database

**Page 6 - Table S4.** Decisions of EMA and European countries concerning approval of BNT162b2 and ChAdOx1 nCoV-19 vaccines and their administration to people of different ages and different target groups

**Page 7 - Table S5.** Percentage of vaccines doses administered in each age range in Europe

**Page 8 - Table S6.** Number of individual patient reports of severe AE and death related to thrombocytopenia/bleeding and blood clots reported in the EudraVigilance database

**Page 9 - Table S7.** Number of individual patient reports of severe AE related to cerebral venous thrombosis, splanchnic vein thrombosis, thrombocytopenia, and with one or more AEs related to the above events

**Page 11 - Table S8.** Number of individual patient reports of death related to cerebral venous thrombosis and/or splanchnic vein thrombosis and/or thrombocytopenia

**Page 13 - Table S9.** Number of individual patient reports of severe AE per million doses related to cerebral venous thrombosis

**Page 14 - Table S10.** Number of individual patient reports of death per million doses related to cerebral venous thrombosis

**Page 15 - Table S11.** Number of individual patient reports of severe AE per million doses related to splanchnic vein thrombosis

**Page 16 - Table S12.** Number of individual patient reports of severe AE per million doses related to thrombocytopenia

**Page 17 - Table S13.** Number of individual patient reports of death per million doses related to splanchnic vein thrombosis

**Page 18 - Table S14.** Number of individual patient reports of death per million doses related to thrombocytopenia

**Page 19 - Table S15.** Number of individual patient reports of severe AE per million doses related to cerebral venous thrombosis and/or splanchnic vein thrombosis and/or thrombocytopenia

**Page 20 - Table S16.** Number of individual patient reports of death per million doses related to cerebral venous thrombosis and/or splanchnic vein thrombosis and/or thrombocytopenia

**Page 21 - Table S17.** Single patient reports of severe AE per 1 million doses related to the specified AE categories determined by thrombocytopenia/bleeding and blood clots events

**Page 22 - Table S18.** Frequency of thrombohemorrhagic events in vaccine-untreated and BNT162b2-treated population

**Page 23 - Table S19.** Number of individual patient reports of AE per million doses administered, calculated considering the number of doses administered in Europe at W12

**Page 24 - Table S20.** Percentage of deaths over the number of individual patient reports of severe AE related to cerebral venous thrombosis, splanchnic vein thrombosis, thrombocytopenia, and with one or more AEs related to the above events

**Page 25 - Figure S1** European countries providing information about administration of a specific vaccine in each age group.

**Page 26 - Figure S2** Frequency of individual cases with specific AEs among BNT162b2 and ChAdOx1 nCoV-19 recipients divided into age groups and calculated considering the number of vaccines administered 2 weeks before the last observed AEs.

## Keywords for download of SAEs single case reports

For analyses concerning the number of reported SAEs indicating venous thrombosis and bleeding, we used the below-mentioned keywords. If a keywords indicated both venous and arterial thrombosis was taken: 1 “cerebral thrombosis”, 2 “cerebral vascular occlusion”, 3 “cerebral venous sinus thrombosis”, 4 “cerebral venous thrombosis”, 5 “superior sagittal sinus thrombosis”, 6 “transverse sinus thrombosis”, 7 “splenic vein occlusion”, 8 “splenic vein thrombosis”, 9 “mesenteric vein thrombosis”, 10 “mesenteric venous occlusion”, 11 “visceral venous thrombosis”, 12 “hepatic vein thrombosis”, 13 “portal vein occlusion”, 14 “portal vein thrombosis”, 15 “portosplenomesenteric venous thrombosis”, 16 “splenic thrombosis”, 17 “thrombosis mesenteric vessel”, 18 “hepatic vascular thrombosis”, 19 “autoimmune heparin-induced thrombocytopenia”, 20 “heparin-induced thrombocytopenia”, 21 “hypocoagulable state”, 22 “immune thrombocytopenia”, 23 “platelet disorder”, 24 “spontaneous heparin-induced thrombocytopenia syndrome”, 25 “thrombocytopenia”, 26 “severe fever with thrombocytopenia syndrome”, 27 “coagulopathy”, 28 “haemorrhagic diathesis”, 29 “increased tendency to bruise”, 30 “spontaneous haematoma”, 31 “spontaneous haemorrhage”, 32 “thrombocytopenic purpura”, 33 “thrombotic thrombocytopenic purpura”, 34 “mucosal haemorrhage”, 35 “pulmonary haemorrhage”, 36 “haemorrhage subcutaneous”, 37 “haematoma”, 38 “haemorrhage”, 39 “haemorrhagic infarction”, 40 “internal haemorrhage”, 41 “venous haemorrhage”, 42 “diarrhoea haemorrhagic”, 43 “gastric haemorrhage”, 44 “gastrointestinal haemorrhage”, 45 “haematemesis”, 46 “haematochezia”, 47 “haemoperitoneum”, 48 “intestinal haemorrhage”, 49 “intra-abdominal haematoma”, 50 “melaena”, 51 “mesenteric haemorrhage”, 52 “retroperitoneal haemorrhage”, 53 “small intestinal haemorrhage”, 54 “upper gastrointestinal haemorrhage”, 55 “hepatic haemorrhage”, 56 “brain stem haemorrhage”, 57 “cerebellar haematoma”, 58 “cerebellar haemorrhage”, 59 “cerebral haematoma”, 60 “cerebral haemorrhage”, 61 “haemorrhage intracranial”, 62 “haemorrhagic cerebral infarction”, 63 “haemorrhagic stroke”, 64 “haemorrhagic transformation stroke”, 65 “intracranial haematoma”, 66 “intraventricular haemorrhage”, 67 “spinal cord haemorrhage”, 68 “spinal epidural haemorrhage”, 69 “subarachnoid haemorrhage”, 70 “thalamus haemorrhage”, 71 “hypercoagulation”, 72 “thrombotic microangiopathy”, 73 “renal vascular thrombosis”, 74 “renal vein thrombosis”, 75 “axillary vein thrombosis”, 76 “deep vein thrombosis”, 77 “jugular vein thrombosis”, 78 “pelvic venous thrombosis”, 79 “subclavian vein thrombosis”, 80 “thrombosis”, 81 “vascular occlusion”, 82 “vena cava thrombosis”, 83 “venous occlusion”, 84 “venous thrombosis”, 85 “venous thrombosis limb”, 86 “disseminated intravascular coagulation”, 87 “pulmonary artery thrombosis”, 88 “pulmonary embolism”, 89 “pulmonary thrombosis”, 90 “basal ganglia stroke”, 91 “brain stem stroke”, 92 “cerebellar stroke”, 93 “cerebrovascular accident”, 94 “cerebrovascular disorder”, and 95 “lacunar infarction”.

For the analyses reported in Table 1 we used the above-mentioned keywords that were placed in 10 categories linked to thrombocytopenia/bleeding and blood clots. **Cerebral venous thrombosis:** keywords 1 to 6; **splanchnic vein thrombosis:** keywords 7 to 18; **thrombocytopenia:** keywords 19 to 26; **other bleeding events:** keywords 27 to 41; **gastrointestinal bleeding:** keywords 41 to 55; **cerebral bleeding:** keywords 56 to 70; **other venous thrombosis:** keywords 71 to 85; **disseminated intravascular coagulation:** keyword 86; **pulmonary thromboembolism:** keywords 87 to 89; **ischemic stroke:** keywords 90 to 95.

**Table S1.** Gender distribution of vaccines administered doses in Europe

| <b>European Countries</b>          | <b>Doses administered in female</b> | <b>Doses administered in male</b> | <b>% of doses administered in female</b> | <b>% of doses administered in male</b> | <b>Date of the report</b>   | <b>Link to the data source</b> |
|------------------------------------|-------------------------------------|-----------------------------------|------------------------------------------|----------------------------------------|-----------------------------|--------------------------------|
| <b>Belgium</b>                     | 2,108,809                           | 1,323,014                         | 61.45                                    | 38.55                                  | 25 <sup>th</sup> April 2021 | <a href="#">LINK</a>           |
| <b>Danmark</b>                     | 1,078,138                           | 723,239                           | 59.85                                    | 40.15                                  | 25 <sup>th</sup> April 2021 | <a href="#">LINK</a>           |
| <b>France</b>                      | 11,113,504                          | 8,384,058                         | 57.00                                    | 43.00                                  | 24 <sup>th</sup> April 2021 | <a href="#">LINK</a>           |
| <b>Germany</b>                     | 7,273,370                           | 4,091,271                         | 64.00                                    | 36.00                                  | 24 <sup>th</sup> March 2021 | <a href="#">LINK</a>           |
| <b>Italy</b>                       | 10,344,476                          | 7,665,571                         | 57.44                                    | 42.56                                  | 26 <sup>th</sup> April 2021 | <a href="#">LINK</a>           |
| <b>Norway</b>                      | 796,434                             | 638,623                           | 55.50                                    | 44.50                                  | 26 <sup>th</sup> April 2021 | <a href="#">LINK</a>           |
| <b>Poland</b>                      | 6,150,000                           | 4,185,000                         | 59.51                                    | 40.49                                  | 26 <sup>th</sup> April 2021 | <a href="#">LINK</a>           |
| <b>Spain</b>                       | 4,167,439                           | 1,953,649                         | 68.08                                    | 31.92                                  | 21 <sup>st</sup> March 2021 | <a href="#">LINK</a>           |
| <b>Total of doses administered</b> | 43,032,170                          | 28,964,425                        | 59.78                                    | 40.22                                  |                             |                                |

**Table S2.** Number of vaccines administered doses in Europe

|                                                                               | <b>BNT162b2</b>       |               |               |               |               |               |              | <b>ChAdOx1 nCoV-19</b> |               |               |               |               |               |              |
|-------------------------------------------------------------------------------|-----------------------|---------------|---------------|---------------|---------------|---------------|--------------|------------------------|---------------|---------------|---------------|---------------|---------------|--------------|
|                                                                               | <b>Total</b>          |               |               |               |               |               |              | <b>Total</b>           |               |               |               |               |               |              |
| <b>W12 whole Europe<sup>a</sup></b>                                           | 52,053,994            |               |               |               |               |               |              | 13,732,385             |               |               |               |               |               |              |
| <b>W14 whole Europe<sup>b</sup></b>                                           | 68,500,787            |               |               |               |               |               |              | 19,970,905             |               |               |               |               |               |              |
| <b>whole Europe<sup>c</sup></b>                                               | 71,210,981            |               |               |               |               |               |              | 20,869,192             |               |               |               |               |               |              |
|                                                                               | <b>Total</b>          | <b>18-24y</b> | <b>25-49y</b> | <b>50-59y</b> | <b>60-69y</b> | <b>70-79y</b> | <b>80+ y</b> | <b>Total</b>           | <b>18-24y</b> | <b>25-49y</b> | <b>50-59y</b> | <b>60-69y</b> | <b>70-79y</b> | <b>80+ y</b> |
| <b>European countries that provides age groups data (W12)<sup>d</sup> (%)</b> | 23,294,890<br>(44.8%) | 550,590       | 4,847,056     | 2,790,467     | 2,283,500     | 3,713,738     | 9,109,539    | 6,221,518<br>(45.3%)   | 198,906       | 2,108,123     | 1,418,311     | 1,449,706     | 711,104       | 335,368      |
| <b>European countries that provides age groups data (W14)<sup>d</sup> (%)</b> | 30541280<br>(44.6%)   | 626,808       | 5,520,384     | 3,316,348     | 3,312,870     | 6,149,992     | 11,614,878   | 8,875,503<br>(44.4%)   | 253,292       | 2,551,867     | 1,672,355     | 2,317,087     | 1,632,715     | 448,187      |

<sup>a</sup> Data downloaded from European Centre for Disease Prevention and Control (ECDC) European data-bank “Vaccine rollout overview week 12<sup>th</sup>,2021” ([LINK](#))

<sup>b</sup> Data downloaded from European Centre for Disease Prevention and Control (ECDC) European data-bank “Vaccine rollout overview week 14<sup>th</sup>,2021” ([LINK](#))

<sup>c</sup> Data downloaded from European Centre for Disease Prevention and Control (ECDC) European data-bank (COVID-19 Vaccine Tracker tool) on 16<sup>th</sup> of April 2021

<sup>d</sup> Data from the 21 out 30 European Countries that have provided to European Centre for Disease Prevention and Control (ECDC) European data-bank the number of vaccines administered doses in the age groups

**Table S3.** Number of individual patient reports of AE reported in the EudraVigilance database

| Reaction groups:                                     | BNT162b2   |                | ChAdOx1 nCoV-19 |                |
|------------------------------------------------------|------------|----------------|-----------------|----------------|
|                                                      | severe AEs | non-severe AEs | severe AEs      | non-severe AEs |
| Blood and lymphatic system disorders                 | 3250       | 7941           | 3557            | 1762           |
| Cardiac disorders                                    | 4871       | 2501           | 5201            | 2173           |
| Ear and labyrinth disorders                          | 1993       | 2190           | 3495            | 1516           |
| Eye disorders                                        | 2641       | 1988           | 5764            | 2158           |
| Gastrointestinal disorders                           | 12437      | 20893          | 35666           | 20807          |
| General disorders and administration site conditions | 28860      | 74953          | 77748           | 63294          |
| Immune system disorders                              | 2805       | 533            | 1539            | 298            |
| Infections and infestations                          | 6981       | 3179           | 8208            | 2423           |
| Injury, poisoning and procedural complications       | 2918       | 1032           | 2849            | 1492           |
| Investigations                                       | 4110       | 3485           | 5527            | 4271           |
| Metabolism and nutrition disorders                   | 1668       | 896            | 5457            | 1520           |
| Musculoskeletal and connective tissue disorders      | 13947      | 39767          | 41336           | 41186          |
| Nervous system disorders                             | 23413      | 42332          | 67785           | 44088          |
| Psychiatric disorders                                | 3376       | 2632           | 7340            | 2174           |
| Renal and urinary disorders                          | 726        | 212            | 1293            | 452            |
| Reproductive system and breast disorders             | 570        | 424            | 1154            | 922            |
| Respiratory, thoracic and mediastinal disorders      | 8860       | 5094           | 11841           | 3983           |
| Skin and subcutaneous tissue disorders               | 7533       | 8638           | 16731           | 6437           |
| Vascular disorders                                   | 4941       | 3279           | 6198            | 2508           |

**Table S4.** Decisions of EMA and European countries concerning approval of BNT162b2 and ChAdOx1 nCoV-19 vaccines and their administration to people of different ages and different target groups

|                        |                                           | Recommendation for vulnerable and fragile <sup>a</sup> | January 2021 | February 2021 | March 2021 | April 2021 | May 2021 |
|------------------------|-------------------------------------------|--------------------------------------------------------|--------------|---------------|------------|------------|----------|
| <b>BNT162b2</b>        | people under age of 55 or 65 <sup>b</sup> |                                                        |              |               |            |            |          |
|                        | people over age of 55 or 60 <sup>c</sup>  |                                                        |              |               |            |            |          |
| <b>ChAdOx1 nCoV-19</b> | people under age of 55 or 65 <sup>c</sup> |                                                        |              |               |            |            |          |
|                        | people over age of 55 or 60 <sup>d</sup>  |                                                        |              |               |            |            |          |

<sup>a</sup> European Countries recommendations of specific COVID-19 vaccine products for particular target groups (vulnerable and fragile)

European countries policy, update of 29 March 2021: [LINK](#)

European countries policy, update of 6 May 2021: [LINK](#)

Italian statment, update 9 February 2021: [LINK](#)

Italian statment, update 22 February 2021: [LINK](#)

<sup>b</sup> 21 December 2020: approved by EMA for over 18 people

EMA statment: [LINK](#)

<sup>c</sup> 29 January 2021: approved by EMA for over 18 people, but restricted to 18-54 or 18-64 from European Countries

EMA statment: [LINK](#)

German statment, update 29 January: [LINK](#)

Italian statment, update 9 February 2021: [LINK](#)

Italian statment, update 22 February 2021: [LINK](#)

<sup>d</sup> 15 March and 7 april 2021: confirmed by EMA for over 18 people, but restricted to 18-54 or 18-64 from European Countries

EMA statment, update 15 March 2021: [LINK](#)

EMA statment, update 7 April 2021: [LINK](#)

European countries policy, update of 29 March 2021: [LINK](#)

European countries policy, update of 6 May 2021: [LINK](#)

**Table S5.** Percentage of vaccines doses administered in each age range in Europe

|                                                                          | BNT162b2 |        |        |        |        |        | ChAdOx1 nCoV-19 |        |        |        |        |       |
|--------------------------------------------------------------------------|----------|--------|--------|--------|--------|--------|-----------------|--------|--------|--------|--------|-------|
|                                                                          | 18-24y   | 25-49y | 50-59y | 60-69y | 70-79y | 80+ y  | 18-24y          | 25-49y | 50-59y | 60-69y | 70-79y | 80+ y |
| <b>European contries that provides age groups data (W12)<sup>a</sup></b> | 2.36%    | 20.81% | 11.98% | 9.80%  | 15.94% | 39.11% | 3.20%           | 33.88% | 22.80% | 23.30% | 11.43% | 5.39% |
| <b>European contries that provides age groups data (W14)<sup>a</sup></b> | 2.05%    | 18.08% | 10.86% | 10.85% | 20.14% | 38.03% | 2.85%           | 28.75% | 18.84% | 26.11% | 18.40% | 5.05% |

<sup>a</sup> Data from the 21 out 30 European Countries that have provided to European Centre for Disease Prevention and Control (ECDC) European data-bank the number of vaccines administered doses in the age groups

**Table S6.** Number of individual patient reports of severe AE and death related to thrombocytopenia/bleeding and blood clots<sup>a</sup> reported in the EudraVigilance database

|            | BNT162b2   |                                | ChAdOx1 nCoV-19 |                                       |                                                                           |            |
|------------|------------|--------------------------------|-----------------|---------------------------------------|---------------------------------------------------------------------------|------------|
|            | absolute # | BNT162b2 # per 1,000,000 doses | absolute #      | ChAdOx1 nCoV-19 # per 1,000,000 doses | severe AE rate of ChAdOx1 nCoV-19 over the severe AE rate of BNT162b2 AEs | fold risk  |
| severe AEs | 2528       | 35.5                           | 3159            | 151.4                                 | <b>116</b>                                                                | <b>4.3</b> |
| deaths     | 313        | 4.4                            | 273             | 13.1                                  | <b>9</b>                                                                  | <b>3.0</b> |

<sup>a</sup> The terms used to find the individual patient reports related to the specified event are reported in the Material and methods section



**Table S7.** Number of individual patient reports of severe AE related to cerebral venous thrombosis, splanchnic vein thrombosis, thrombocytopenia, and with one or more AEs related to the above events

| cerebral venous thrombosis <sup>a</sup> |                      |                |       |       |                        |       |       |     |                      |                         |                     |
|-----------------------------------------|----------------------|----------------|-------|-------|------------------------|-------|-------|-----|----------------------|-------------------------|---------------------|
|                                         |                      | 18-24          | 25-49 | 50-59 | severe AEs<br>in 18-59 | 60-69 | 70-79 | 80+ | severe AEs<br>in 60+ | age<br>not<br>specified | total<br>severe AEs |
| <b>BNT162b2</b>                         | males                | 2 <sup>b</sup> | 5     | 3     | <b>10</b>              | 0     | 3     | 4   | <b>7</b>             | 1                       | <b>18</b>           |
|                                         | females              | 0              | 11    | 3     | <b>14</b>              | 8     | 2     | 14  | <b>24</b>            | 2                       | <b>40</b>           |
|                                         | gender not specified | 0              | 0     | 0     | <b>0</b>               | 0     | 0     | 0   | <b>0</b>             | 0                       | <b>0</b>            |
|                                         | total<br>severe AEs  | 2              | 16    | 6     | <b>24</b>              | 8     | 5     | 18  | <b>31</b>            | 3                       | <b>58</b>           |
| <b>ChAdOx1<br/>nCoV-19</b>              | males                | 7              | 19    | 14    | <b>40</b>              | 6     | 5     | 0   | <b>11</b>            | 5                       | <b>56</b>           |
|                                         | females              | 10             | 78    | 34    | <b>122</b>             | 17    | 4     | 2   | <b>23</b>            | 6                       | <b>151</b>          |
|                                         | gender not specified | 0              | 0     | 0     | <b>0</b>               | 0     | 0     | 0   | <b>0</b>             | 2                       | <b>2</b>            |
|                                         | total<br>severe AEs  | 17             | 97    | 48    | <b>162</b>             | 23    | 9     | 2   | <b>34</b>            | 13                      | <b>209</b>          |
| splanchnic vein thrombosis <sup>a</sup> |                      |                |       |       |                        |       |       |     |                      |                         |                     |
|                                         |                      | 18-24          | 25-49 | 50-59 | severe AEs<br>in 18-59 | 60-69 | 70-79 | 80+ | severe AEs<br>in 60+ | age<br>not<br>specified | total<br>severe AEs |
| <b>BNT162b2</b>                         | males                | 0              | 1     | 2     | <b>3</b>               | 3     | 1     | 1   | <b>5</b>             | 0                       | <b>8</b>            |
|                                         | females              | 0              | 1     | 1     | <b>2</b>               | 2     | 1     | 2   | <b>5</b>             | 0                       | <b>7</b>            |
|                                         | gender not specified | 0              | 0     | 0     | <b>0</b>               | 0     | 0     | 0   | <b>0</b>             | 0                       | <b>0</b>            |
|                                         | total<br>severe AEs  | 0              | 2     | 3     | <b>5</b>               | 5     | 2     | 3   | <b>10</b>            | 0                       | <b>15</b>           |
| <b>ChAdOx1<br/>nCoV-19</b>              | males                | 0              | 9     | 5     | <b>14</b>              | 8     | 2     | 0   | <b>10</b>            | 1                       | <b>25</b>           |
|                                         | females              | 2              | 21    | 5     | <b>28</b>              | 4     | 2     | 0   | <b>6</b>             | 2                       | <b>36</b>           |
|                                         | gender not specified | 0              | 0     | 0     | <b>0</b>               | 0     | 0     | 0   | <b>0</b>             | 0                       | <b>0</b>            |
|                                         | total<br>severe AEs  | 2              | 30    | 10    | <b>42</b>              | 12    | 4     | 0   | <b>16</b>            | 3                       | <b>61</b>           |

| thrombocytopenia <sup>a</sup>                                                                     |                      |                |       |       |                        |       |       |     |                      |                         |                     |
|---------------------------------------------------------------------------------------------------|----------------------|----------------|-------|-------|------------------------|-------|-------|-----|----------------------|-------------------------|---------------------|
|                                                                                                   |                      | 18-24          | 25-49 | 50-59 | severe AEs<br>in 18-59 | 60-69 | 70-79 | 80+ | severe AEs<br>in 60+ | age<br>not<br>specified | total<br>severe AEs |
| <b>BNT162b2</b>                                                                                   | males                | 5              | 14    | 15    | 34                     | 7     | 25    | 28  | 60                   | 4                       | 98                  |
|                                                                                                   | females              | 4              | 41    | 16    | 61                     | 10    | 13    | 30  | 53                   | 4                       | 118                 |
|                                                                                                   | gender not specified | 0              | 0     | 0     | 0                      | 0     | 1     | 1   | 2                    | 1                       | 3                   |
|                                                                                                   | total<br>severe AEs  | 9              | 55    | 31    | 95                     | 17    | 39    | 59  | 115                  | 9                       | 219                 |
| <b>ChAdOx1<br/>nCoV-19</b>                                                                        | males                | 9              | 53    | 36    | 98                     | 30    | 16    | 5   | 51                   | 15                      | 164                 |
|                                                                                                   | females              | 12             | 120   | 73    | 205                    | 54    | 24    | 13  | 91                   | 19                      | 315                 |
|                                                                                                   | gender not specified | 0              | 0     | 0     | 0                      | 0     | 1     | 0   | 1                    | 6                       | 7                   |
|                                                                                                   | total<br>severe AEs  | 21             | 173   | 109   | 303                    | 84    | 41    | 18  | 143                  | 40                      | 486                 |
| cerebral venous thrombosis and/or splanchnic vein thrombosis and/or thrombocytopenia <sup>a</sup> |                      |                |       |       |                        |       |       |     |                      |                         |                     |
|                                                                                                   |                      | 18-24          | 25-49 | 50-59 | severe AEs<br>in 18-59 | 60-69 | 70-79 | 80+ | severe AEs<br>in 60+ | age<br>not<br>specified | total<br>severe AEs |
| <b>BNT162b2</b>                                                                                   | males                | 7 <sup>b</sup> | 20    | 17    | 44                     | 10    | 28    | 33  | 71                   | 5                       | 120                 |
|                                                                                                   | females              | 4              | 53    | 20    | 77                     | 20    | 16    | 43  | 79                   | 6                       | 162                 |
|                                                                                                   | gender not specified | 0              | 0     | 0     | 0                      | 0     | 1     | 1   | 2                    | 1                       | 3                   |
|                                                                                                   | total<br>severe AEs  | 11             | 73    | 37    | 121                    | 30    | 45    | 77  | 152                  | 12                      | 285                 |
| <b>ChAdOx1<br/>nCoV-19</b>                                                                        | males                | 12             | 64    | 50    | 126                    | 37    | 23    | 5   | 65                   | 19                      | 210                 |
|                                                                                                   | females              | 18             | 165   | 91    | 274                    | 66    | 28    | 15  | 109                  | 25                      | 408                 |
|                                                                                                   | gender not specified | 0              | 0     | 0     | 0                      | 0     | 1     | 0   | 1                    | 8                       | 9                   |
|                                                                                                   | total<br>severe AEs  | 30             | 229   | 141   | 400                    | 103   | 52    | 20  | 175                  | 52                      | 627                 |

<sup>a</sup> The terms used to find the individual patient reports related to the specified event are reported in the Material and methods section

<sup>b</sup> One case happened in a 16 years old boy but is considered in the 18-24 age range

**Table S8.** Number of individual patient reports of death related to cerebral venous thrombosis and/or splanchnic vein thrombosis and/or thrombocytopenia

| cerebral venous thrombosis <sup>a</sup> |                      |       |       |       |                        |       |       |     |                      |                         |                     |
|-----------------------------------------|----------------------|-------|-------|-------|------------------------|-------|-------|-----|----------------------|-------------------------|---------------------|
|                                         |                      | 18-24 | 25-49 | 50-59 | severe AEs<br>in 18-59 | 60-69 | 70-79 | 80+ | severe AEs<br>in 60+ | age<br>not<br>specified | total<br>severe AEs |
| <b>BNT162b2</b>                         | males                | 0     | 0     | 0     | 0                      | 0     | 1     | 0   | 1                    | 0                       | 1                   |
|                                         | females              | 0     | 0     | 1     | 1                      | 0     | 0     | 3   | 3                    | 0                       | 4                   |
|                                         | gender not specified | 0     | 0     | 0     | 0                      | 0     | 0     | 0   | 0                    | 0                       | 0                   |
|                                         | total<br>severe AEs  | 0     | 0     | 1     | 1                      | 0     | 1     | 3   | 4                    | 0                       | 5                   |
| <b>ChAdOx1<br/>nCoV-19</b>              | males                | 2     | 10    | 0     | 12                     | 2     | 1     | 0   | 3                    | 1                       | 16                  |
|                                         | females              | 2     | 18    | 7     | 27                     | 7     | 2     | 0   | 9                    | 1                       | 37                  |
|                                         | gender not specified | 0     | 0     | 0     | 0                      | 0     | 0     | 0   | 0                    | 0                       | 0                   |
|                                         | total<br>severe AEs  | 4     | 28    | 7     | 39                     | 9     | 3     | 0   | 12                   | 2                       | 53                  |
| splanchnic vein thrombosis <sup>a</sup> |                      |       |       |       |                        |       |       |     |                      |                         |                     |
|                                         |                      | 18-24 | 25-49 | 50-59 | severe AEs<br>in 18-59 | 60-69 | 70-79 | 80+ | severe AEs<br>in 60+ | age<br>not<br>specified | total<br>severe AEs |
| <b>BNT162b2</b>                         | males                | 0     | 0     | 0     | 0                      | 0     | 0     | 1   | 1                    | 0                       | 1                   |
|                                         | females              | 0     | 0     | 1     | 1                      | 0     | 0     | 1   | 1                    | 0                       | 2                   |
|                                         | gender not specified | 0     | 0     | 0     | 0                      | 0     | 0     | 0   | 0                    | 0                       | 0                   |
|                                         | total<br>severe AEs  | 0     | 0     | 1     | 1                      | 0     | 0     | 2   | 2                    | 0                       | 3                   |
| <b>ChAdOx1<br/>nCoV-19</b>              | males                | 0     | 1     | 1     | 2                      | 1     | 0     | 0   | 1                    | 0                       | 3                   |
|                                         | females              | 0     | 4     | 2     | 6                      | 0     | 0     | 0   | 0                    | 0                       | 6                   |
|                                         | gender not specified | 0     | 0     | 0     | 0                      | 0     | 0     | 0   | 0                    | 0                       | 0                   |
|                                         | total<br>severe AEs  | 0     | 5     | 3     | 8                      | 1     | 0     | 0   | 1                    | 0                       | 9                   |

| thrombocytopenia <sup>a</sup>                                                                     |                      |       |       |       |                        |       |       |     |                      |                         |                     |
|---------------------------------------------------------------------------------------------------|----------------------|-------|-------|-------|------------------------|-------|-------|-----|----------------------|-------------------------|---------------------|
|                                                                                                   |                      | 18-24 | 25-49 | 50-59 | severe AEs<br>in 18-59 | 60-69 | 70-79 | 80+ | severe AEs<br>in 60+ | age<br>not<br>specified | total<br>severe AEs |
| <b>BNT162b2</b>                                                                                   | males                | 0     | 0     | 3     | 3                      | 0     | 7     | 3   | 10                   | 1                       | 14                  |
|                                                                                                   | females              | 0     | 1     | 1     | 2                      | 1     | 0     | 3   | 4                    | 0                       | 6                   |
|                                                                                                   | gender not specified | 0     | 0     | 0     | 0                      | 0     | 0     | 0   | 0                    | 0                       | 0                   |
|                                                                                                   | total<br>severe AEs  | 0     | 1     | 4     | 5                      | 1     | 7     | 6   | 14                   | 1                       | 20                  |
| <b>ChAdOx1<br/>nCoV-19</b>                                                                        | males                | 1     | 13    | 3     | 17                     | 2     | 1     | 0   | 3                    | 2                       | 22                  |
|                                                                                                   | females              | 2     | 23    | 14    | 39                     | 12    | 4     | 1   | 17                   | 2                       | 58                  |
|                                                                                                   | gender not specified | 0     | 0     | 0     | 0                      | 0     | 0     | 0   | 0                    | 1                       | 1                   |
|                                                                                                   | total<br>severe AEs  | 3     | 36    | 17    | 56                     | 14    | 5     | 1   | 20                   | 5                       | 81                  |
| cerebral venous thrombosis and/or splanchnic vein thrombosis and/or thrombocytopenia <sup>a</sup> |                      |       |       |       |                        |       |       |     |                      |                         |                     |
|                                                                                                   |                      | 18-24 | 25-49 | 50-59 | severe AEs<br>in 18-59 | 60-69 | 70-79 | 80+ | severe AEs<br>in 60+ | age<br>not<br>specified | total<br>severe AEs |
| <b>BNT162b2</b>                                                                                   | males                | 0     | 0     | 3     | 3                      | 0     | 7     | 4   | 11                   | 1                       | 15                  |
|                                                                                                   | females              | 0     | 1     | 3     | 4                      | 1     | 0     | 7   | 8                    | 0                       | 12                  |
|                                                                                                   | gender not specified | 0     | 0     | 0     | 0                      | 0     | 0     | 0   | 0                    | 0                       | 0                   |
|                                                                                                   | total<br>severe AEs  | 0     | 1     | 6     | 7                      | 1     | 7     | 11  | 19                   | 1                       | 27                  |
| <b>ChAdOx1<br/>nCoV-19</b>                                                                        | males                | 3     | 16    | 4     | 23                     | 3     | 2     | 0   | 5                    | 3                       | 31                  |
|                                                                                                   | females              | 2     | 27    | 16    | 45                     | 14    | 5     | 1   | 20                   | 3                       | 68                  |
|                                                                                                   | gender not specified | 0     | 0     | 0     | 0                      | 0     | 0     | 0   | 0                    | 1                       | 1                   |
|                                                                                                   | total<br>severe AEs  | 5     | 43    | 20    | 68                     | 17    | 7     | 1   | 25                   | 7                       | 100                 |

<sup>a</sup> The terms used to find the individual patient reports related to the specified event are reported in the Material and methods section

**Table S9.** Number of individual patient reports of severe AE per million doses related to cerebral venous thrombosis

|                                   | BNT162b2 |        |        |        |        |       | ChAdOx1 nCoV-19 |        |        |        |        |       |
|-----------------------------------|----------|--------|--------|--------|--------|-------|-----------------|--------|--------|--------|--------|-------|
|                                   | 18-24y   | 25-49y | 50-59y | 60-69y | 70-79y | 80+ y | 18-24y          | 25-49y | 50-59y | 60-69y | 70-79y | 80+ y |
| <b>europaean mean<sup>a</sup></b> | 1.37     | 1.32   | 0.78   | 1.17   | 0.35   | 0.70  | 30.23           | 17.17  | 12.97  | 4.59   | 2.60   | 1.90  |
| <b>simulation 1<sup>b</sup></b>   | 1.65     | 1.69   | 0.92   | 1.39   | 0.27   | 0.67  | 20.48           | 17.91  | 13.00  | 5.31   | 2.18   | 1.97  |
| <b>simulation 2<sup>b</sup></b>   | 1.41     | 1.26   | 0.72   | 1.29   | 0.57   | 0.59  | 40.91           | 15.96  | 11.89  | 8.21   | 1.73   | 2.29  |
| <b>simulation 3<sup>b</sup></b>   | 1.66     | 1.30   | 0.80   | 1.68   | 0.29   | 0.70  | 21.02           | 21.11  | 18.41  | 3.48   | 2.50   | 1.70  |
| <b>simulation 4<sup>b</sup></b>   | 1.73     | 1.35   | 0.70   | 1.22   | 0.34   | 0.70  | 24.19           | 21.80  | 17.23  | 3.13   | 2.85   | 2.14  |
| <b>simulation 5<sup>b</sup></b>   | 1.44     | 1.27   | 0.76   | 1.28   | 0.51   | 0.60  | 39.75           | 16.20  | 10.78  | 8.16   | 1.82   | 2.56  |

<sup>a</sup> Severe AEs per million doses were calculated as follows: 1) the number of doses of a specific vaccine given to the European population was multiplied by the fraction of the subjects within an age range calculated considering the data from the European Countries giving these pieces of information; 2) the number of severe AE reports concerning subjects within each range age (Table S7) was divided by the number obtained with the above-described procedure and multiplied by 1,000,000

<sup>b</sup> Severe AEs per million doses were calculated as reported above but the fraction of the subjects within an age range was calculated considering the data from only five European Countries randomly chosen among the ones giving the appropriate information

**Table S10.** Number of individual patient reports of death per million doses related to cerebral venous thrombosis

|                                   | BNT162b2 |        |        |        |        |       | ChAdOx1 nCoV-19 |        |        |        |        |       |
|-----------------------------------|----------|--------|--------|--------|--------|-------|-----------------|--------|--------|--------|--------|-------|
|                                   | 18-24y   | 25-49y | 50-59y | 60-69y | 70-79y | 80+ y | 18-24y          | 25-49y | 50-59y | 60-69y | 70-79y | 80+ y |
| <b>europaean mean<sup>a</sup></b> | 0.00     | 0.00   | 0.13   | 0.00   | 0.07   | 0.11  | 3.36            | 5.33   | 1.78   | 1.65   | 0.78   | 0.00  |
| <b>simulation 1<sup>b</sup></b>   | 0.00     | 0.00   | 0.15   | 0.00   | 0.05   | 0.11  | 2.28            | 5.56   | 1.78   | 1.91   | 0.65   | 0.00  |
| <b>simulation 2<sup>b</sup></b>   | 0.00     | 0.00   | 0.12   | 0.00   | 0.11   | 0.09  | 4.55            | 4.96   | 1.63   | 2.96   | 0.52   | 0.00  |
| <b>simulation 3<sup>b</sup></b>   | 0.00     | 0.00   | 0.13   | 0.00   | 0.06   | 0.11  | 2.34            | 6.56   | 2.53   | 1.25   | 0.75   | 0.00  |
| <b>simulation 4<sup>b</sup></b>   | 0.00     | 0.00   | 0.12   | 0.00   | 0.07   | 0.11  | 2.69            | 6.77   | 2.36   | 1.13   | 0.85   | 0.00  |
| <b>simulation 5<sup>b</sup></b>   | 0.00     | 0.00   | 0.13   | 0.00   | 0.10   | 0.09  | 4.42            | 5.03   | 1.48   | 2.94   | 0.55   | 0.00  |

<sup>a</sup> Deaths per million doses were calculated as follows: 1) the number of doses of a specific vaccine given to the European population was multiplied by the fraction of the subjects within an age range calculated considering the data from the European Countries giving these pieces of information; 2) the number of death reports concerning subjects within each range age (Table S8) was divided by the number obtained with the above-described procedure and multiplied by 1,000,000

<sup>b</sup> Deaths per million doses were calculated as reported above but the fraction of the subjects within an age range was calculated considering the data from only five European Countries randomly chosen among the ones giving the appropriate information

**Table S11.** Number of individual patient reports of severe AE per million doses related to splanchnic vein thrombosis

|                                   | BNT162b2 |        |        |        |        |       | ChAdOx1 nCoV-19 |        |        |        |        |       |
|-----------------------------------|----------|--------|--------|--------|--------|-------|-----------------|--------|--------|--------|--------|-------|
|                                   | 18-24y   | 25-49y | 50-59y | 60-69y | 70-79y | 80+ y | 18-24y          | 25-49y | 50-59y | 60-69y | 70-79y | 80+ y |
| <b>europaean mean<sup>a</sup></b> | 0.00     | 0.16   | 0.39   | 0.65   | 0.14   | 0.11  | 3.36            | 5.33   | 2.67   | 2.29   | 1.04   | 0.00  |
| <b>simulation 1<sup>b</sup></b>   | 0.00     | 0.20   | 0.46   | 0.77   | 0.11   | 0.11  | 2.28            | 5.56   | 2.68   | 2.65   | 0.87   | 0.00  |
| <b>simulation 2<sup>b</sup></b>   | 0.00     | 0.15   | 0.36   | 0.72   | 0.23   | 0.09  | 4.55            | 4.96   | 2.45   | 4.10   | 0.69   | 0.00  |
| <b>simulation 3<sup>b</sup></b>   | 0.00     | 0.15   | 0.40   | 0.93   | 0.12   | 0.11  | 2.34            | 6.56   | 3.79   | 1.74   | 1.00   | 0.00  |
| <b>simulation 4<sup>b</sup></b>   | 0.00     | 0.16   | 0.35   | 0.68   | 0.14   | 0.11  | 2.69            | 6.77   | 3.55   | 1.56   | 1.14   | 0.00  |
| <b>simulation 5<sup>b</sup></b>   | 0.00     | 0.15   | 0.38   | 0.71   | 0.21   | 0.09  | 4.42            | 5.03   | 2.22   | 4.08   | 0.73   | 0.00  |

<sup>a</sup> Severe AEs per million doses were calculated as follows: 1) the number of doses of a specific vaccine given to the European population was multiplied by the fraction of the subjects within an age range calculated considering the data from the European Countries giving these pieces of information; 2) the number of severe AE reports concerning subjects within each range age (Table S7) was divided by the number obtained with the above-described procedure and multiplied by 1,000,000

<sup>b</sup> Severe AEs per million doses were calculated as reported above but the fraction of the subjects within an age range was calculated considering the data from only five European Countries randomly chosen among the ones giving the appropriate information

**Table S12.** Number of individual patient reports of severe AE per million doses related to thrombocytopenia

|                                   | BNT162b2 |        |        |        |        |       | ChAdOx1 nCoV-19 |        |        |        |        |       |
|-----------------------------------|----------|--------|--------|--------|--------|-------|-----------------|--------|--------|--------|--------|-------|
|                                   | 18-24y   | 25-49y | 50-59y | 60-69y | 70-79y | 80+ y | 18-24y          | 25-49y | 50-59y | 60-69y | 70-79y | 80+ y |
| <b>europaean mean<sup>a</sup></b> | 6.16     | 4.43   | 4.14   | 2.33   | 2.86   | 2.29  | 38.62           | 31.33  | 30.26  | 16.70  | 11.72  | 18.98 |
| <b>simulation 1<sup>b</sup></b>   | 7.43     | 5.68   | 4.93   | 2.77   | 2.19   | 2.19  | 26.17           | 32.69  | 30.33  | 19.31  | 9.80   | 19.71 |
| <b>simulation 2<sup>b</sup></b>   | 6.33     | 4.23   | 3.82   | 2.59   | 4.70   | 1.92  | 52.28           | 29.13  | 27.75  | 29.88  | 7.80   | 22.95 |
| <b>simulation 3<sup>b</sup></b>   | 7.46     | 4.35   | 4.27   | 3.35   | 2.41   | 2.29  | 26.86           | 38.52  | 42.95  | 12.67  | 11.25  | 16.99 |
| <b>simulation 4<sup>b</sup></b>   | 7.77     | 4.53   | 3.74   | 2.45   | 2.82   | 2.30  | 30.91           | 39.78  | 40.20  | 11.39  | 12.80  | 21.44 |
| <b>simulation 5<sup>b</sup></b>   | 6.47     | 4.25   | 4.04   | 2.55   | 4.21   | 1.96  | 50.79           | 29.56  | 25.15  | 29.69  | 8.21   | 25.64 |

<sup>a</sup> Severe AEs per million doses were calculated as follows: 1) the number of doses of a specific vaccine given to the European population was multiplied by the fraction of the subjects within an age range calculated considering the data from the European Countries giving these pieces of information; 2) the number of severe AE reports concerning subjects within each range age (Table S7) was divided by the number obtained with the above-described procedure and multiplied by 1,000,000

<sup>b</sup> Severe AEs per million doses were calculated as reported above but the fraction of the subjects within an age range was calculated considering the data from only five European Countries randomly chosen among the ones giving the appropriate information



**Table S13.** Number of individual patient reports of death per million doses related to splanchnic vein thrombosis

|                                   | BNT162b2 |        |        |        |        |       | ChAdOx1 nCoV-19 |        |        |        |        |       |
|-----------------------------------|----------|--------|--------|--------|--------|-------|-----------------|--------|--------|--------|--------|-------|
|                                   | 18-24y   | 25-49y | 50-59y | 60-69y | 70-79y | 80+ y | 18-24y          | 25-49y | 50-59y | 60-69y | 70-79y | 80+ y |
| <b>europaean mean<sup>a</sup></b> | 0.00     | 0.00   | 0.13   | 0.00   | 0.00   | 0.07  | 0.00            | 0.83   | 0.76   | 0.18   | 0.00   | 0.00  |
| <b>simulation 1<sup>b</sup></b>   | 0.00     | 0.00   | 0.15   | 0.00   | 0.00   | 0.07  | 0.00            | 0.87   | 0.76   | 0.21   | 0.00   | 0.00  |
| <b>simulation 2<sup>b</sup></b>   | 0.00     | 0.00   | 0.12   | 0.00   | 0.00   | 0.06  | 0.00            | 0.77   | 0.70   | 0.33   | 0.00   | 0.00  |
| <b>simulation 3<sup>b</sup></b>   | 0.00     | 0.00   | 0.13   | 0.00   | 0.00   | 0.07  | 0.00            | 1.02   | 1.08   | 0.14   | 0.00   | 0.00  |
| <b>simulation 4<sup>b</sup></b>   | 0.00     | 0.00   | 0.12   | 0.00   | 0.00   | 0.07  | 0.00            | 1.06   | 1.01   | 0.13   | 0.00   | 0.00  |
| <b>simulation 5<sup>b</sup></b>   | 0.00     | 0.00   | 0.13   | 0.00   | 0.00   | 0.06  | 0.00            | 0.79   | 0.63   | 0.33   | 0.00   | 0.00  |

<sup>a</sup> Deaths per million doses were calculated as follows: 1) the number of doses of a specific vaccine given to the European population was multiplied by the fraction of the subjects within an age range calculated considering the data from the European Countries giving these pieces of information; 2) the number of death reports concerning subjects within each range age (Table S8) was divided by the number obtained with the above-described procedure and multiplied by 1,000,000

<sup>b</sup> Deaths per million doses were calculated as reported above but the fraction of the subjects within an age range was calculated considering the data from only five European Countries randomly chosen among the ones giving the appropriate information

**Table S14.** Number of individual patient reports of death per million doses related to thrombocytopenia

|                                   | BNT162b2 |        |        |        |        |       | ChAdOx1 nCoV-19 |        |        |        |        |       |
|-----------------------------------|----------|--------|--------|--------|--------|-------|-----------------|--------|--------|--------|--------|-------|
|                                   | 18-24y   | 25-49y | 50-59y | 60-69y | 70-79y | 80+ y | 18-24y          | 25-49y | 50-59y | 60-69y | 70-79y | 80+ y |
| <b>europaean mean<sup>a</sup></b> | 0.00     | 0.08   | 0.52   | 0.13   | 0.56   | 0.22  | 5.04            | 6.50   | 4.58   | 2.75   | 1.30   | 0.95  |
| <b>simulation 1<sup>b</sup></b>   | 0.00     | 0.10   | 0.62   | 0.15   | 0.43   | 0.21  | 3.41            | 6.78   | 4.59   | 3.18   | 1.09   | 0.99  |
| <b>simulation 2<sup>b</sup></b>   | 0.00     | 0.07   | 0.48   | 0.14   | 0.92   | 0.19  | 6.82            | 6.04   | 4.20   | 4.93   | 0.87   | 1.15  |
| <b>simulation 3<sup>b</sup></b>   | 0.00     | 0.08   | 0.53   | 0.19   | 0.47   | 0.22  | 3.50            | 7.99   | 6.50   | 2.09   | 1.25   | 0.85  |
| <b>simulation 4<sup>b</sup></b>   | 0.00     | 0.08   | 0.47   | 0.14   | 0.55   | 0.22  | 4.03            | 8.25   | 6.08   | 1.88   | 1.42   | 1.07  |
| <b>simulation 5<sup>b</sup></b>   | 0.00     | 0.07   | 0.50   | 0.14   | 0.82   | 0.19  | 6.62            | 6.13   | 3.80   | 4.89   | 0.91   | 1.28  |

<sup>a</sup> Deaths per million doses were calculated as follows: 1) the number of doses of a specific vaccine given to the European population was multiplied by the fraction of the subjects within an age range calculated considering the data from the European Countries giving these pieces of information; 2) the number of death reports concerning subjects within each range age (Table S8) was divided by the number obtained with the above-described procedure and multiplied by 1,000,000

<sup>b</sup> Deaths per million doses were calculated as reported above but the fraction of the subjects within an age range was calculated considering the data from only five European Countries randomly chosen among the ones giving the appropriate information

**Table S15.** Number of individual patient reports of severe AE per million doses related to cerebral venous thrombosis and/or splanchnic vein thrombosis and/or thrombocytopenia

|                                   | BNT162b2 |        |        |        |        |       | ChAdOx1 nCoV-19 |        |        |        |        |       |
|-----------------------------------|----------|--------|--------|--------|--------|-------|-----------------|--------|--------|--------|--------|-------|
|                                   | 18-24y   | 25-49y | 50-59y | 60-69y | 70-79y | 80+ y | 18-24y          | 25-49y | 50-59y | 60-69y | 70-79y | 80+ y |
| <b>europaean mean<sup>a</sup></b> | 8.21     | 5.90   | 5.04   | 4.01   | 3.28   | 2.95  | 53.74           | 41.67  | 39.16  | 20.56  | 14.85  | 20.88 |
| <b>simulation 1<sup>b</sup></b>   | 9.91     | 7.57   | 6.01   | 4.78   | 2.51   | 2.83  | 36.42           | 43.47  | 39.26  | 23.77  | 12.42  | 21.68 |
| <b>simulation 2<sup>b</sup></b>   | 8.44     | 5.64   | 4.65   | 4.46   | 5.39   | 2.48  | 72.73           | 38.74  | 35.91  | 36.78  | 9.88   | 25.24 |
| <b>simulation 3<sup>b</sup></b>   | 9.95     | 5.80   | 5.20   | 5.77   | 2.76   | 2.96  | 37.37           | 51.23  | 55.58  | 15.59  | 14.25  | 18.69 |
| <b>simulation 4<sup>b</sup></b>   | 10.36    | 6.04   | 4.55   | 4.22   | 3.23   | 2.96  | 43.01           | 52.90  | 52.03  | 14.01  | 16.22  | 23.59 |
| <b>simulation 5<sup>b</sup></b>   | 8.63     | 5.66   | 4.92   | 4.39   | 4.82   | 2.53  | 70.66           | 39.31  | 32.55  | 36.54  | 10.40  | 28.20 |

<sup>a</sup> Severe AEs per million doses were calculated as follows: 1) the number of doses of a specific vaccine given to the European population was multiplied by the fraction of the subjects within an age range calculated considering the data from the European Countries giving these pieces of information; 2) the number of severe AE reports concerning subjects within each range age (Table S7) was divided by the number obtained with the above-described procedure and multiplied by 1,000,000

<sup>b</sup> Severe AEs per million doses were calculated as reported above but the fraction of the subjects within an age range was calculated considering the data from only five European Countries randomly chosen among the ones giving the appropriate information

**Table S16.** Number of individual patient reports of death per million doses related to cerebral venous thrombosis and/or splanchnic vein thrombosis and/or thrombocytopenia

|                                   | BNT162b2 |        |        |        |        |       | ChAdOx1 nCoV-19 |        |        |        |        |       |
|-----------------------------------|----------|--------|--------|--------|--------|-------|-----------------|--------|--------|--------|--------|-------|
|                                   | 18-24y   | 25-49y | 50-59y | 60-69y | 70-79y | 80+ y | 18-24y          | 25-49y | 50-59y | 60-69y | 70-79y | 80+ y |
| <b>europaean mean<sup>a</sup></b> | 0.00     | 0.08   | 0.78   | 0.13   | 0.49   | 0.44  | 8.40            | 7.83   | 5.47   | 3.40   | 1.82   | 0.95  |
| <b>simulation 1<sup>b</sup></b>   | 0.00     | 0.10   | 0.92   | 0.15   | 0.37   | 0.42  | 5.69            | 8.17   | 5.48   | 3.93   | 1.53   | 0.99  |
| <b>simulation 2<sup>b</sup></b>   | 0.00     | 0.07   | 0.72   | 0.14   | 0.80   | 0.37  | 11.36           | 7.28   | 5.01   | 6.07   | 1.21   | 1.15  |
| <b>simulation 3<sup>b</sup></b>   | 0.00     | 0.08   | 0.80   | 0.19   | 0.41   | 0.44  | 5.84            | 9.63   | 7.76   | 2.58   | 1.75   | 0.85  |
| <b>simulation 4<sup>b</sup></b>   | 0.00     | 0.08   | 0.70   | 0.14   | 0.48   | 0.44  | 6.72            | 9.95   | 7.26   | 2.31   | 1.99   | 1.07  |
| <b>simulation 5<sup>b</sup></b>   | 0.00     | 0.07   | 0.76   | 0.14   | 0.72   | 0.38  | 11.04           | 7.39   | 4.54   | 6.04   | 1.28   | 1.28  |

<sup>a</sup> Deaths per million doses were calculated as follows: 1) the number of doses of a specific vaccine given to the European population was multiplied by the fraction of the subjects within an age range calculated considering the data from the European Countries giving these pieces of information; 2) the number of death reports concerning subjects within each range age (Table S8) was divided by the number obtained with the above-described procedure and multiplied by 1,000,000

<sup>b</sup> Deaths per million doses were calculated as reported above but the fraction of the subjects within an age range was calculated considering the data from only five European Countries randomly chosen among the ones giving the appropriate information

**Table S17:** Single patient reports of severe AE per 1 million doses related to the specified AE categories determined by thrombocytopenia/bleeding and blood clots events

|                                                   |                                        | Severe AEs/1,000,000 doses  |                    |                    |                    |                    |                    |                             |                    |                    |                    |                    |                    |                             |                    |                    |                    |                    |                    |                             |                    |                    |                    |                    |                    |     |
|---------------------------------------------------|----------------------------------------|-----------------------------|--------------------|--------------------|--------------------|--------------------|--------------------|-----------------------------|--------------------|--------------------|--------------------|--------------------|--------------------|-----------------------------|--------------------|--------------------|--------------------|--------------------|--------------------|-----------------------------|--------------------|--------------------|--------------------|--------------------|--------------------|-----|
|                                                   |                                        | BNT162b2                    |                    |                    |                    |                    |                    |                             |                    |                    |                    |                    |                    | ChAdOx1 nCoV-19             |                    |                    |                    |                    |                    |                             |                    |                    |                    |                    |                    |     |
|                                                   |                                        | 18-64y                      |                    |                    |                    |                    |                    | 65+ y                       |                    |                    |                    |                    |                    | 18-64y                      |                    |                    |                    |                    |                    | 65+ y                       |                    |                    |                    |                    |                    |     |
|                                                   |                                        | europaean mean <sup>a</sup> | sim 1 <sup>b</sup> | sim 2 <sup>b</sup> | sim 3 <sup>b</sup> | sim 4 <sup>b</sup> | sim 5 <sup>b</sup> | europaean mean <sup>a</sup> | sim 1 <sup>b</sup> | sim 2 <sup>b</sup> | sim 3 <sup>b</sup> | sim 4 <sup>b</sup> | sim 5 <sup>b</sup> | europaean mean <sup>a</sup> | sim 1 <sup>b</sup> | sim 2 <sup>b</sup> | sim 3 <sup>b</sup> | sim 4 <sup>b</sup> | sim 5 <sup>b</sup> | europaean mean <sup>a</sup> | sim 1 <sup>b</sup> | sim 2 <sup>b</sup> | sim 3 <sup>b</sup> | sim 4 <sup>b</sup> | sim 5 <sup>b</sup> |     |
| Severe AEs more frequent in younger               | cerebral venous thrombosis             | 1.1                         | 1.3                | 1.0                | 1.1                | 1.1                | 1.1                | 0.6                         | 0.5                | 0.6                | 0.6                | 0.6                | 0.6                | 13.5                        | 13.6               | 13.9               | 14.5               | 14.2               | 13.5               | 2.6                         | 2.5                | 2.4                | 2.3                | 2.4                | 2.6                |     |
|                                                   | splanchnic vein thrombosis             | 0.3                         | 0.4                | 0.3                | 0.3                | 0.3                | 0.3                | 0.2                         | 0.1                | 0.2                | 0.1                | 0.2                | 0.2                | 3.8                         | 3.9                | 3.9                | 4.1                | 4.0                | 3.8                | 1.0                         | 1.0                | 1.0                | 0.9                | 0.9                | 1.0                |     |
|                                                   | thrombocytopenia                       | 4.0                         | 5.1                | 4.0                | 4.3                | 4.1                | 4.0                | 2.3                         | 2.1                | 2.3                | 2.2                | 2.3                | 2.3                | 27.1                        | 27.4               | 27.9               | 29.3               | 28.5               | 27.1               | 11.8                        | 11.6               | 11.3               | 10.5               | 10.9               | 11.8               |     |
|                                                   | other bleeding events                  | 7.3                         | 9.2                | 7.2                | 7.9                | 7.4                | 7.3                | 3.0                         | 2.6                | 3.0                | 2.8                | 2.9                | 3.0                | 18.8                        | 19.1               | 19.4               | 20.3               | 19.8               | 18.8               | 8.3                         | 8.2                | 8.0                | 7.4                | 7.7                | 8.3                |     |
| Severe AEs with similar rate in younger and older | gastrointestinal bleeding              | 3.1                         | 3.9                | 3.0                | 3.3                | 3.1                | 3.1                | 2.1                         | 1.9                | 2.2                | 2.1                | 2.1                | 2.1                | 7.4                         | 7.5                | 7.6                | 8.0                | 7.8                | 7.4                | 4.9                         | 4.8                | 4.7                | 4.3                | 4.5                | 4.9                |     |
|                                                   | cerebral bleeding                      | 1.8                         | 2.2                | 1.8                | 1.9                | 1.8                | 1.8                | 3.0                         | 2.7                | 3.0                | 2.9                | 3.0                | 3.0                | 10.8                        | 10.9               | 11.1               | 11.7               | 11.3               | 10.8               | 8.2                         | 8.0                | 7.8                | 7.3                | 7.6                | 8.2                |     |
|                                                   | other venous thrombosis                | 8.6                         | 10.7               | 8.4                | 9.2                | 8.7                | 8.6                | 7.6                         | 6.8                | 7.7                | 7.3                | 7.6                | 7.6                | 51.4                        | 52.1               | 52.9               | 55.5               | 54.1               | 51.4               | 47.5                        | 46.5               | 45.3               | 42.2               | 43.8               | 47.5               |     |
|                                                   | disseminated intravascular coagulation | 0.1                         | 0.1                | 0.1                | 0.1                | 0.1                | 0.1                | 0.1                         | 0.1                | 0.1                | 0.1                | 0.1                | 0.1                | 1.5                         | 1.5                | 1.5                | 1.6                | 1.5                | 1.5                | 1.5                         | 1.5                | 1.5                | 1.5                | 1.4                | 1.4                | 1.5 |
|                                                   | pulmonary thromboembolism              | 6.2                         | 7.7                | 6.1                | 6.6                | 6.2                | 6.2                | 8.7                         | 7.8                | 8.8                | 8.4                | 8.7                | 8.7                | 29.6                        | 30.0               | 30.5               | 32.0               | 31.1               | 29.6               | 35.2                        | 34.4               | 33.6               | 31.2               | 32.5               | 35.2               |     |
| Severe AEs more frequent in older                 | ischemic stroke                        | 4.4                         | 5.5                | 4.3                | 4.7                | 4.4                | 4.4                | 8.5                         | 7.6                | 8.6                | 8.2                | 8.4                | 8.5                | 15.1                        | 15.3               | 15.6               | 16.4               | 15.9               | 15.1               | 28.6                        | 28.0               | 27.3               | 25.4               | 26.4               | 28.6               |     |

<sup>a</sup> Severe AEs per million doses were calculated as follows: 1) the number of doses of a specific vaccine given to the European population was multiplied by the fraction of the subjects within an age range calculated considering the data from the European Countries giving these pieces of information; 2) the number of severe AE reports concerning subjects within each range age (Table S7) was divided by the number obtained with the above-described procedure and multiplied by 1,000,000

<sup>b</sup> Severe AEs per million doses were calculated as reported above but the fraction of the subjects within an age range was calculated considering the data from only five European Countries randomly chosen among the ones giving the appropriate information

**Table S18.** Frequency of thrombohemorrhagic events in vaccine-untreated and BNT162b2-treated population

|                                                      | events/1 million persons per year        |        |                    |           |
|------------------------------------------------------|------------------------------------------|--------|--------------------|-----------|
|                                                      | general incidence<br>18-65y <sup>a</sup> |        | BNT162b2<br>18-64y |           |
|                                                      | Denmark                                  | Norway | observation period |           |
|                                                      |                                          |        | 1 month            | 0.5 month |
| <b>venous thromboembolic events</b>                  | 1580                                     | 1260   | 407                | 814       |
| <b>cerebral venous thrombosis</b>                    | 20                                       | 10     | 13                 | 26        |
| <b>splanchnic vein thrombosis</b>                    | 40                                       | 60     | 3.6                | 7.2       |
| <b>thrombocytopenia</b>                              | 150                                      | 380    | 49                 | 97        |
| <b>gastric/gastrointestinal bleeding<sup>b</sup></b> | 180                                      | n.a.   | 37                 | 74        |
| <b>cerebral bleeding</b>                             | 200                                      | 140    | 22                 | 43        |
| <b>disseminated intravascular<br/>coagulation</b>    | 10                                       | 20     | 1.0                | 1.9       |
| <b>pulmonary thromboembolism</b>                     | 570                                      | 570    | 70                 | 148       |
| <b>stroke<sup>c</sup></b>                            | 400                                      | 60     | 53                 | 105       |

<sup>a</sup> data from Pottegård and colleagues that excluded from the analysis patients with a history of a given outcome during a one year fixed washout period

<sup>b</sup> data regarding general incidence refers to "intestinal bleeding" and data regarding SAE due to BNT162b2 refers to "gastrointestinal bleeding"

<sup>c</sup> data of general incidence refers to "stroke, unspecified" and data regarding SAE due to BNT162b2 refers to "ischemic stroke"

**Table S19.** Number of individual patient reports of AE per million doses administered, calculated considering the number of doses administered in Europe at W12

|                                                                                                                                                 | <b>BNT162b2</b> | <b>ChAdOx1 nCoV-19</b> |
|-------------------------------------------------------------------------------------------------------------------------------------------------|-----------------|------------------------|
| overall number of individual patient reports of AE per million doses administered                                                               | 2,778           | 12,335                 |
| number of individual patient reports of severe AE caused by the thrombocytopenia/bleeding and blood clots events per million doses administered | 48.6            | 230.0                  |
| number of individual patient reports of severe AE caused by CVT events <sup>a</sup> per million doses administered                              | 1.1             | 15.2                   |
| number of individual patient reports of severe AE caused by splanchnic vein thrombosis events <sup>a</sup> per million doses administered       | 0.3             | 4.4                    |
| number of individual patient reports of severe AE caused by thrombocytopenia events <sup>a</sup> per million doses administered                 | 4.2             | 35.4                   |
| number of individual patient reports of severe AE caused by the three merged categories events <sup>a</sup> per million doses administered      | 5.5             | 45.7                   |

<sup>a</sup> The terms used to find the individual patient reports related to the specified event are reported in the Material and methods section

**Table S20.** Percentage of deaths over the number of individual patient reports of severe AE related to cerebral venous thrombosis, splanchnic vein thrombosis, thrombocytopenia, and with one or more AEs related to the above events

|                                                                                                         | BNT162b2             |              |        |        |        |        |       | ChAdOx1 nCoV-19      |        |        |        |        |        |              |
|---------------------------------------------------------------------------------------------------------|----------------------|--------------|--------|--------|--------|--------|-------|----------------------|--------|--------|--------|--------|--------|--------------|
|                                                                                                         | Overall <sup>a</sup> | 18-24y       | 25-49y | 50-59y | 60-69y | 70-79y | 80+ y | Overall <sup>a</sup> | 18-24y | 25-49y | 50-59y | 60-69y | 70-79y | 80+ y        |
| <b>cerebral venous thrombosis<sup>b</sup></b>                                                           | 8.6%                 | 0.0%         | 0.0%   | 16.7%  | 0.0%   | 20.0%  | 16.7% | 25.4%                | 23.5%  | 28.9%  | 14.6%  | 39.1%  | 33.3%  | 0.0%         |
| <b>splanchnic vein thrombosis<sup>b</sup></b>                                                           | 20.0%                | <sup>c</sup> | 0.0%   | 33.3%  | 0.0%   | 0.0%   | 66.7% | 14.8%                | 0.0%   | 16.7%  | 30.0%  | 8.3%   | 0.0%   | <sup>c</sup> |
| <b>thrombocytopenia<sup>b</sup></b>                                                                     | 9.1%                 | 0.0%         | 1.8%   | 12.9%  | 5.9%   | 17.9%  | 10.2% | 16.7%                | 14.3%  | 20.8%  | 15.6%  | 16.7%  | 12.2%  | 5.6%         |
| <b>cerebral venous thrombosis and/or splanchnic vein thrombosis and/or thrombocytopenia<sup>b</sup></b> | 9.5%                 | 0.0%         | 1.4%   | 16.2%  | 3.3%   | 15.6%  | 14.3% | 15.9%                | 16.7%  | 18.8%  | 14.2%  | 16.5%  | 13.5%  | 5.0%         |

<sup>a</sup> The overall percentage of deaths over the number of individual patient reports of severe AE also consider the reports in which the age was not specified

<sup>b</sup> The terms used to find the individual patient reports related to the specified event are reported in the Material and methods section

<sup>c</sup> In this age group are not reported severe AEs related to the specified event



**Figure S1.** European countries providing information about administration of a specific vaccine in each age group.

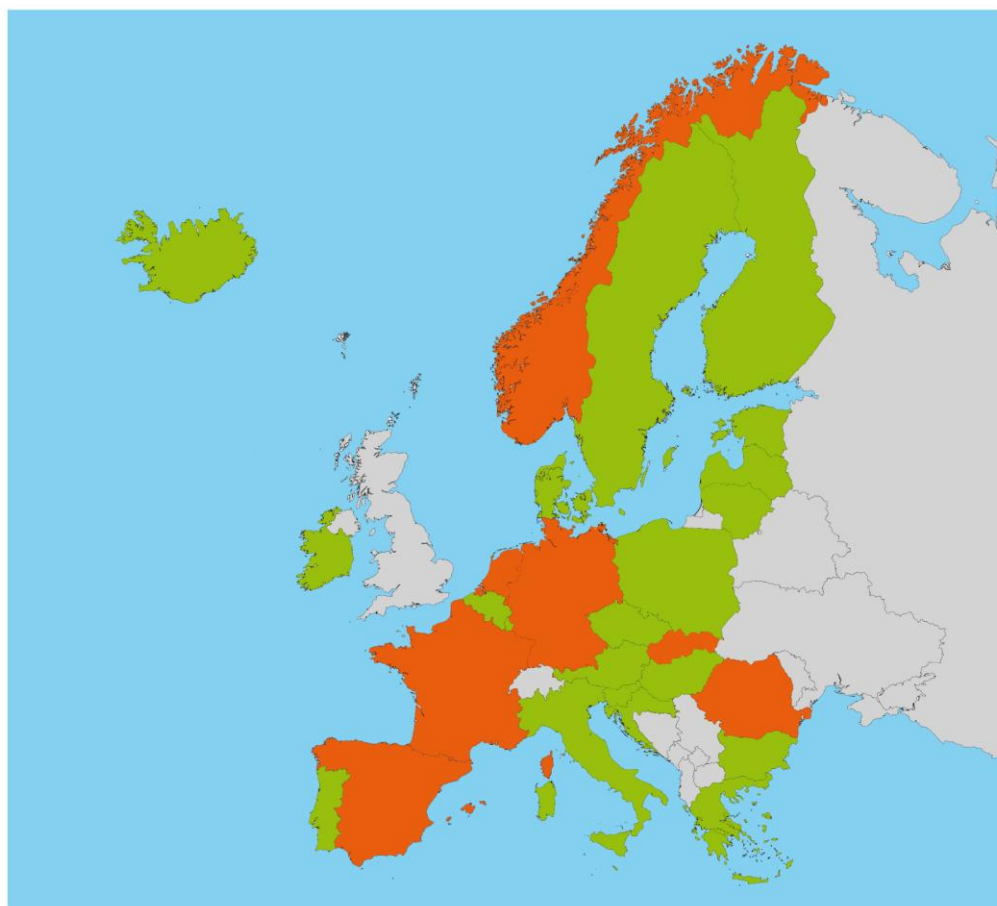

-  Countries that provide data of a specific vaccine administration in each age range
-  Countries that do not provide data of a specific vaccine administration in each age range

**Figure S2.** Frequency of individual cases with specific AEs among BNT162b2 and ChAdOx1 nCoV-19 recipients divided into age groups and calculated considering the number of vaccines administered 2 weeks before the last observed AEs.

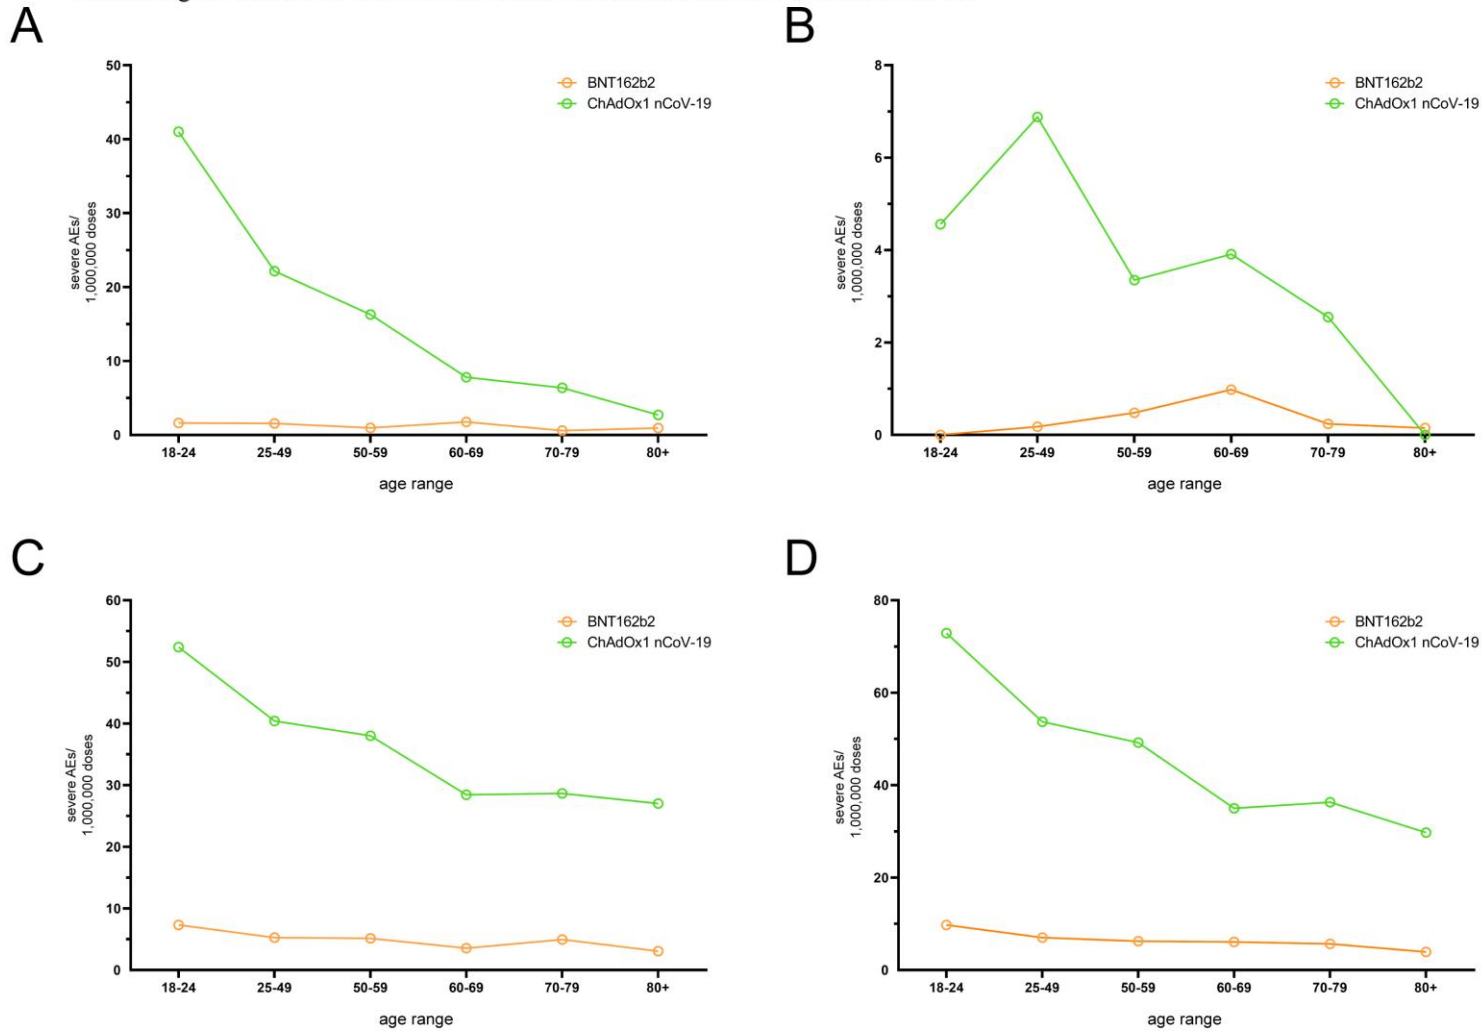

The frequency of individual cases with specific AEs divided into age ranges was obtained by normalization of the number of individual cases (Table S7) with the doses supposedly administered to each age range in Europe at week-12 (Table S2). We needed to evaluate the doses supposedly administered to each age range in Europe. Hence, we considered the doses administered by the European countries providing data regarding administration of each vaccine to age ranges (Figure S1) and set up a method to evaluate the dose variance (see the Material and methods section for details). The frequency (Mean±SD) of individual cases with SAEs consisting of cerebral venous thrombosis (A), splanchnic venous thrombosis (B), thrombocytopenia (C), and cerebral venous thrombosis and/or splanchnic venous thrombosis and/or thrombocytopenia (D) are reported. The frequency of AEs reported in panel D is lower than the sum of the frequency of AEs reported in panels A, B, and C because one individual case may suffer from 2 or 3 AEs simultaneously.
